# Supplementary material for: Titanium oxide-based optoelectronic synapses with visual memory synergistically adjusted by internal emotions and ambient illumination
Source: Royal Society of Chemistry journal article supplement (doi:10.1039/d2ra02749f), 2022-01-01
Supplement: d2ra02749f1.pdf [file d2ra02749f1.pdf]

## Supporting Information

### **Titanium oxide-**based Optoelectronic Synapses with Visual Memory Synergistically Adjusted by Internal Emotions and Ambient Illumination

Yan-bo Guo<sup>a</sup>, Yu-lin Liu<sup>b</sup>, Qi-lai Chen<sup>\*c</sup>, Gang Liu<sup>\*a</sup>

<sup>a</sup> Department of Micro/Nano Electronics, School of Electronic Information and Electrical Engineering, Shanghai Jiao Tong University, Shanghai, 200240, China

<sup>b</sup> School of Materials Science and Engineering, Xiangtan University, Xiangtan, 411105, China

<sup>c</sup> School of Materials, Sun Yat-sen University, Shenzhen, 518107, China

\* Corresponding author.

*E-mail address:* [gang.liu@sjtu.edu.cn](mailto:gang.liu@sjtu.edu.cn), [chenqlai@mail.sysu.edu.cn](mailto:chenqlai@mail.sysu.edu.cn)

The absorbance spectrum of the  $\text{TiO}_{2-x}$  thin film was recorded in the range of 300-1000 nm, as shown in Fig. S1. The optical band gap ( $E_g$ ) is estimated by the Tauc plot.

$$(\alpha h\nu)^{1/n} = B(E_g - h\nu) \quad (1)$$

where  $\alpha$  is the absorption coefficient,  $h$  is the Planck's constant,  $\nu$  is the frequency and  $B$  is a constant. The exponent  $n$  is directly related to the semiconductor type. The optical band gap of  $\text{TiO}_{2-x}$  is estimated to be 3.56eV which exhibits band gap direct transitions ( $n=1/2$ ) [1,2]. The value is consistent with data in other reports [3].

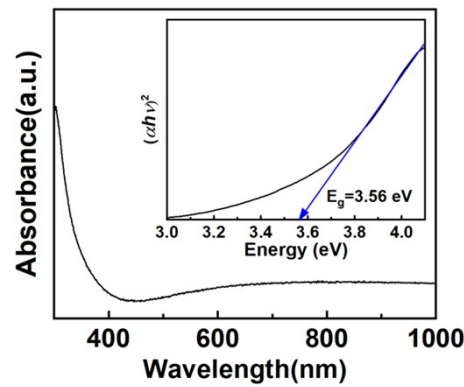

**Fig. S1** Absorbance spectra of the  $\text{TiO}_{2-x}$  based film. Inset: Band gap width fitted according to the Taut plot.

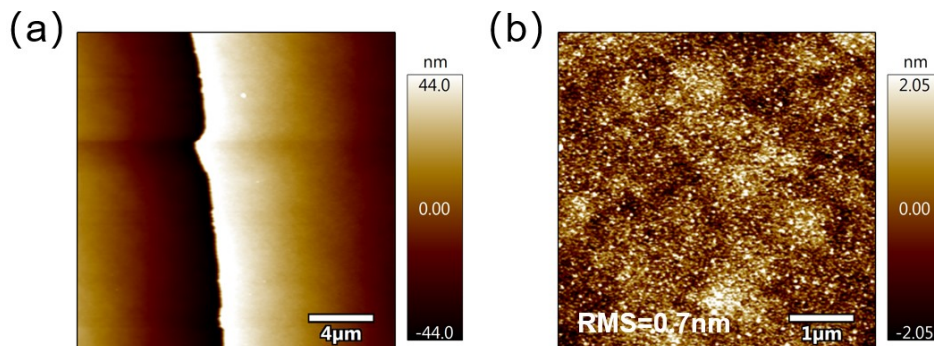

**Fig. S2** The step height (a) and surface (b) image of the as-prepared  $\text{TiO}_{2-x}$  film measured by AFM.

The XPS survey spectrum shown in Fig. S3 reveals that the samples mainly contain Ti, O, and C element.

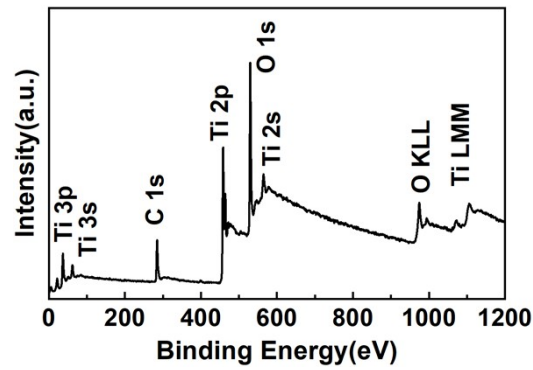

Fig. S3 XPS spectra of survey spectrum

X-ray diffraction images of the surface and deep layers of  $\text{TiO}_{2-x}$  films show that the films contain  $\text{TiO}$ ,  $\text{TiO}_2$ ,  $\text{Ti}_2\text{O}_3$ ,  $\text{Ti}_7\text{O}_{13}$ ,  $\text{Ti}_3\text{O}_5$  and  $\text{TiO}_{0.7207}$  [4-7]. This situation indicates that there are many defect states on the surface and deep layer of  $\text{TiO}_{2-x}$  film.

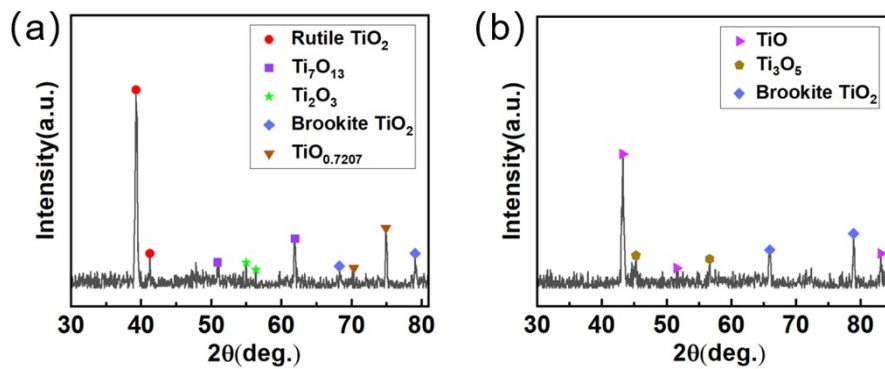

Fig. S4 X-ray diffraction images of the surface (a) and deep layers (b) of  $\text{TiO}_{2-x}$  film.

As shown in Fig. S5, the decayed EPSC curve can be fitted with the Kohlrausch stretched-exponential function shown below [8,9]:

$$I_t = \Delta I \times \exp\left[-(t - \tau)^\beta\right] + I_\infty \quad (2)$$

where  $\tau$  and  $\beta$  is the relaxation time and the stretch index ranged between 0 and 1, respectively, while  $I_\infty$  is the resting current of 1.15 nA. The  $\tau$  value is estimated to be ~15 s.

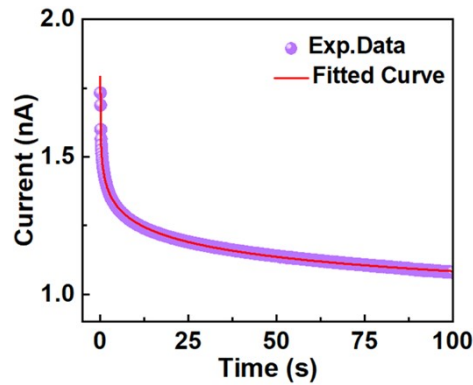

**Fig. S5** The decayed EPSC curve fitted with a stretched exponential function.

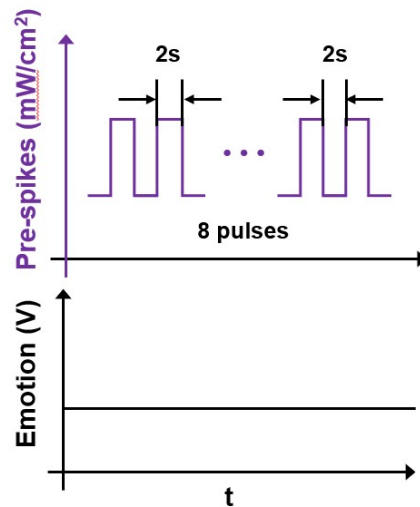

**Fig. S6** Visual event memory process with different internal emotion states. The internal emotion is triggered by 0.5 V and 0.7 V and 1.0 V, respectively. The same visual memory event is fixed to be triggered by the 365 nm light pulses with the intensity of 3.0 mW/cm<sup>2</sup>, duration time of 2 s and interval time of 2 s.

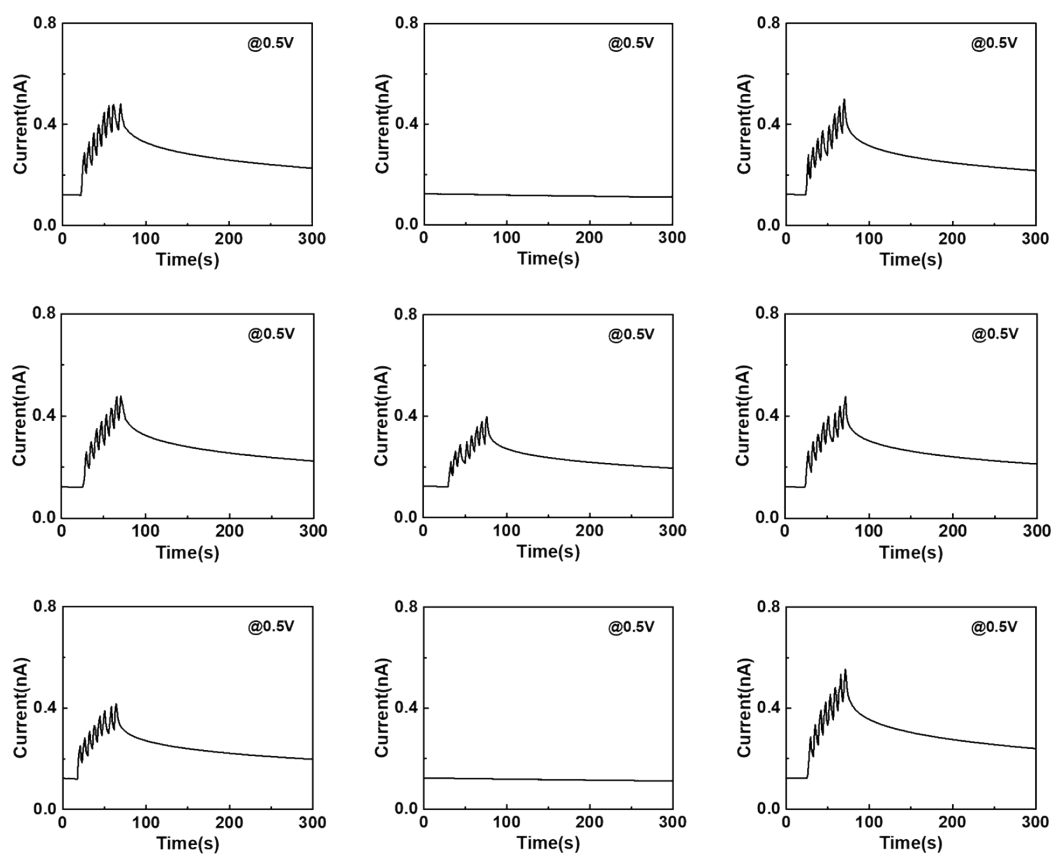

**Fig. S7** The current response under light pre-spikes with bias at 0.5 V.

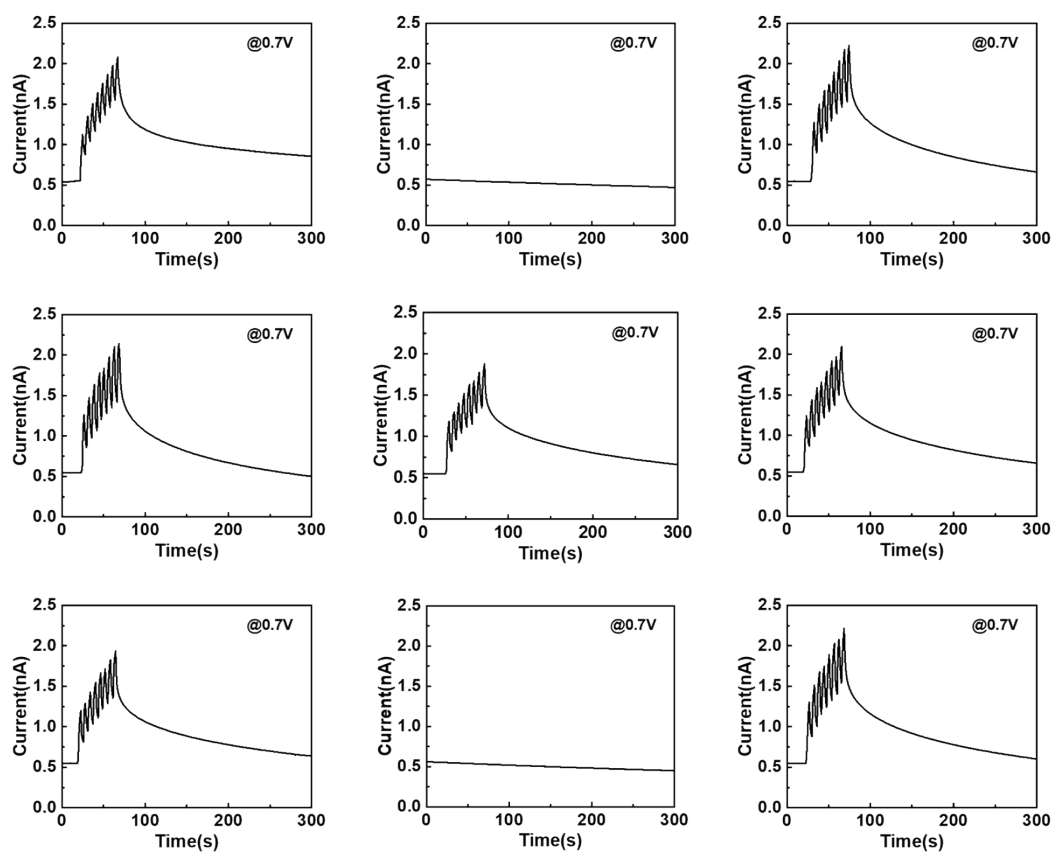

**Fig. S8** The current response under light pre-spikes with bias at 0.7 V.

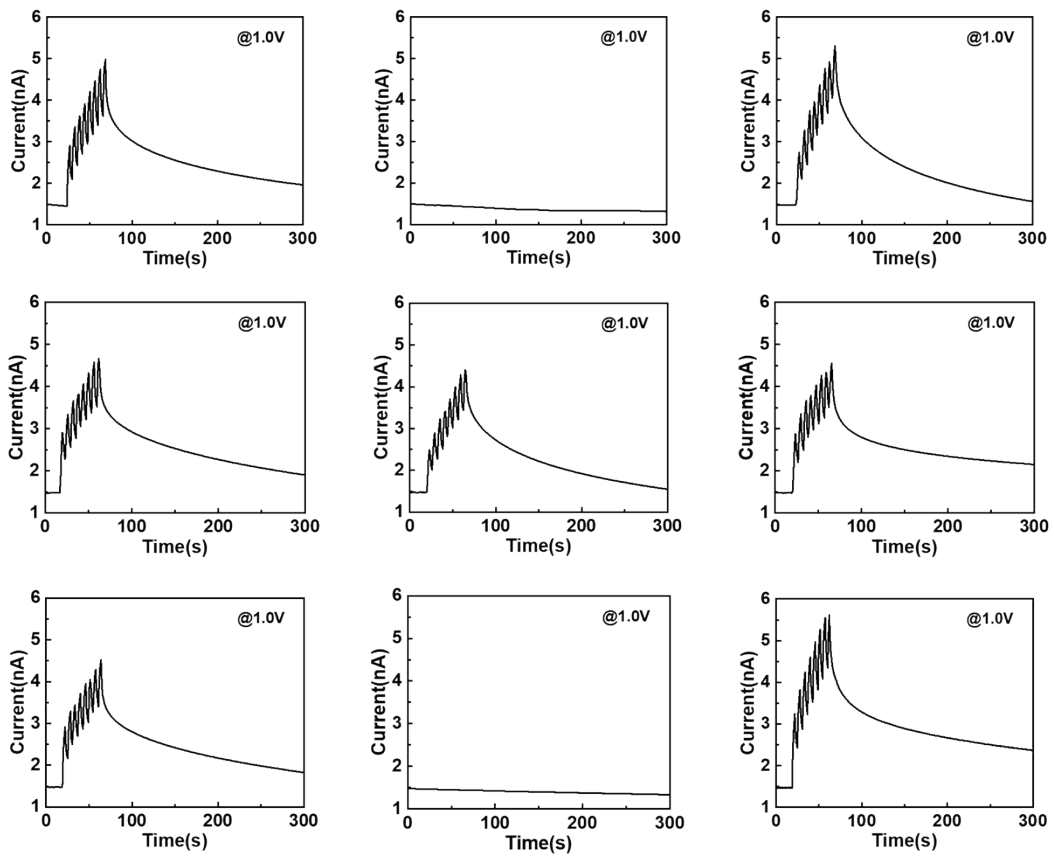

**Fig. S9** The current response under light pre-spikes with bias at 1.0 V.

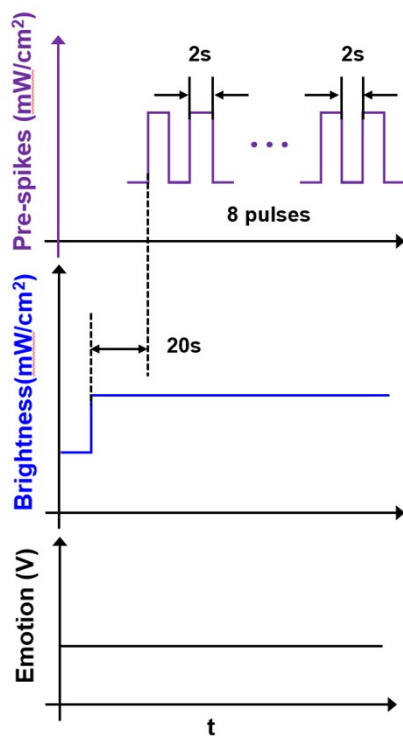

**Fig. S10** Visual event memory process with different ambient brightness. The intensities of ambient brightness are  $1.2 \text{ mW/cm}^2$ ,  $3.0 \text{ mW/cm}^2$  and  $4.0 \text{ mW/cm}^2$ , respectively. The emotion is fixed at 1.0 V (bias).



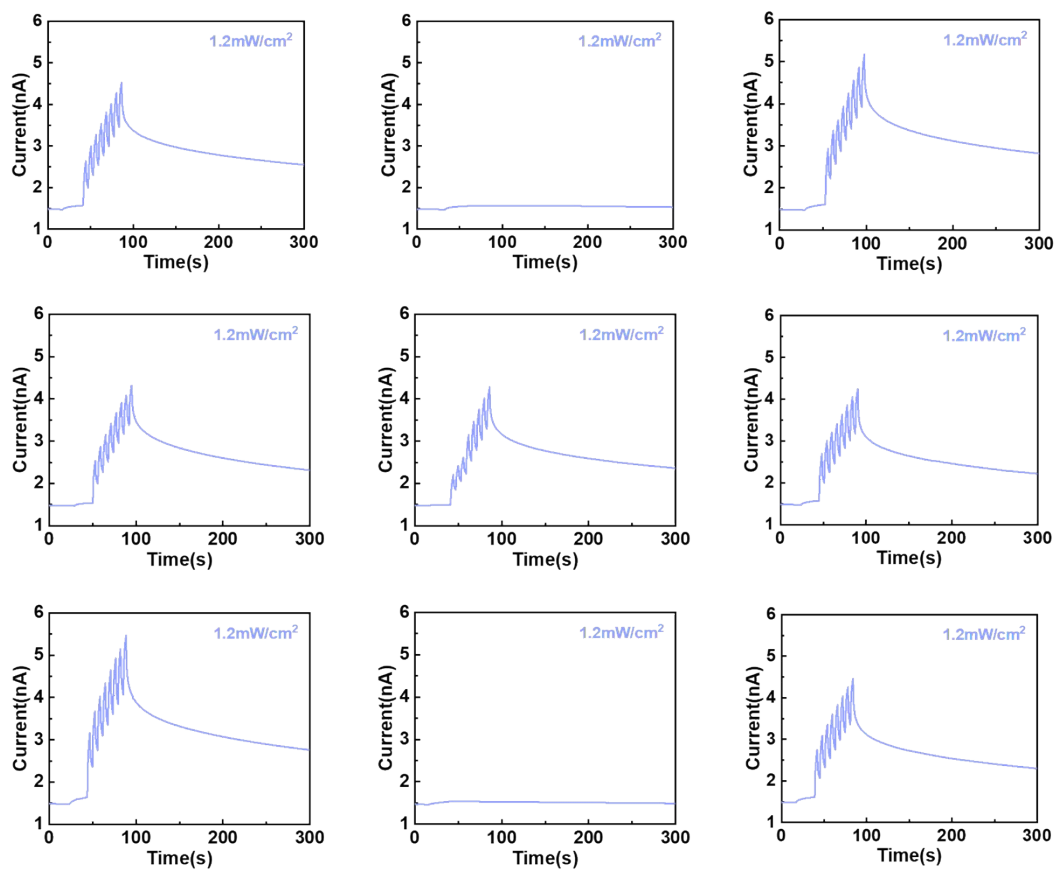

**Fig. S11** The current response triggered by light pulses with ambient brightness of 1.2 mW/cm<sup>2</sup> light intensity.

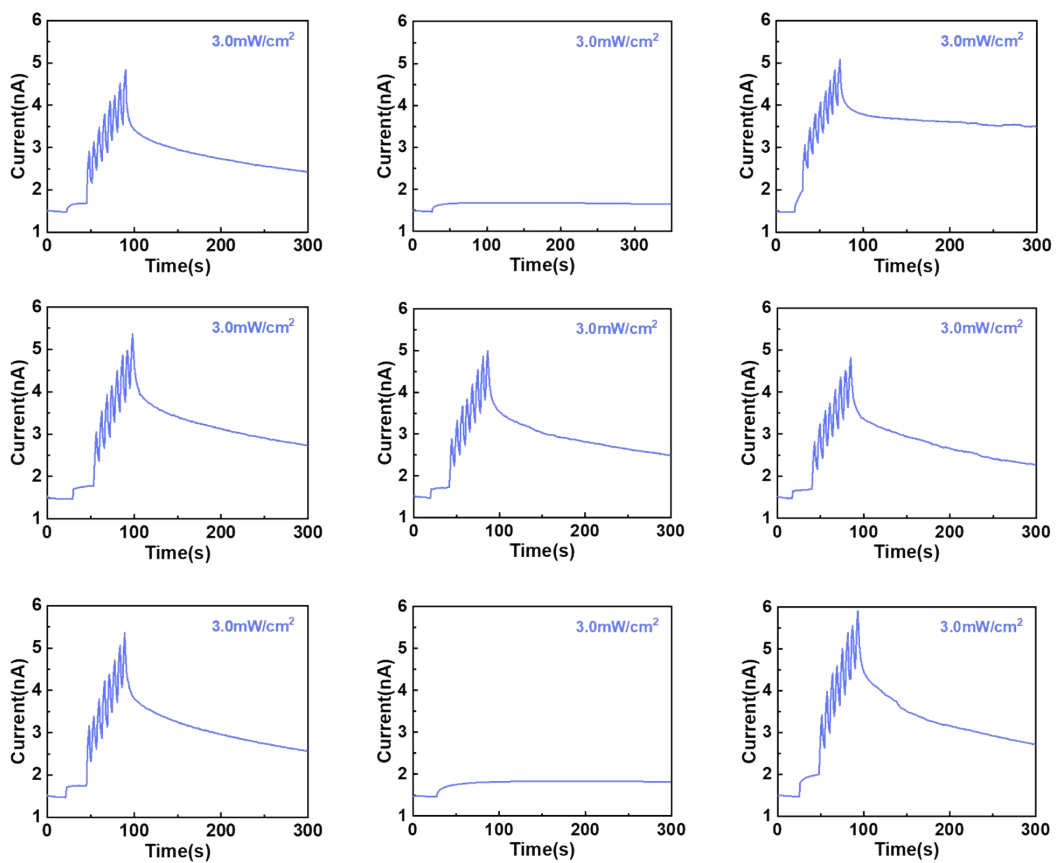

**Fig. S12** The current response triggered by light pulses with ambient brightness of 3.0 mW/cm<sup>2</sup> light intensity.

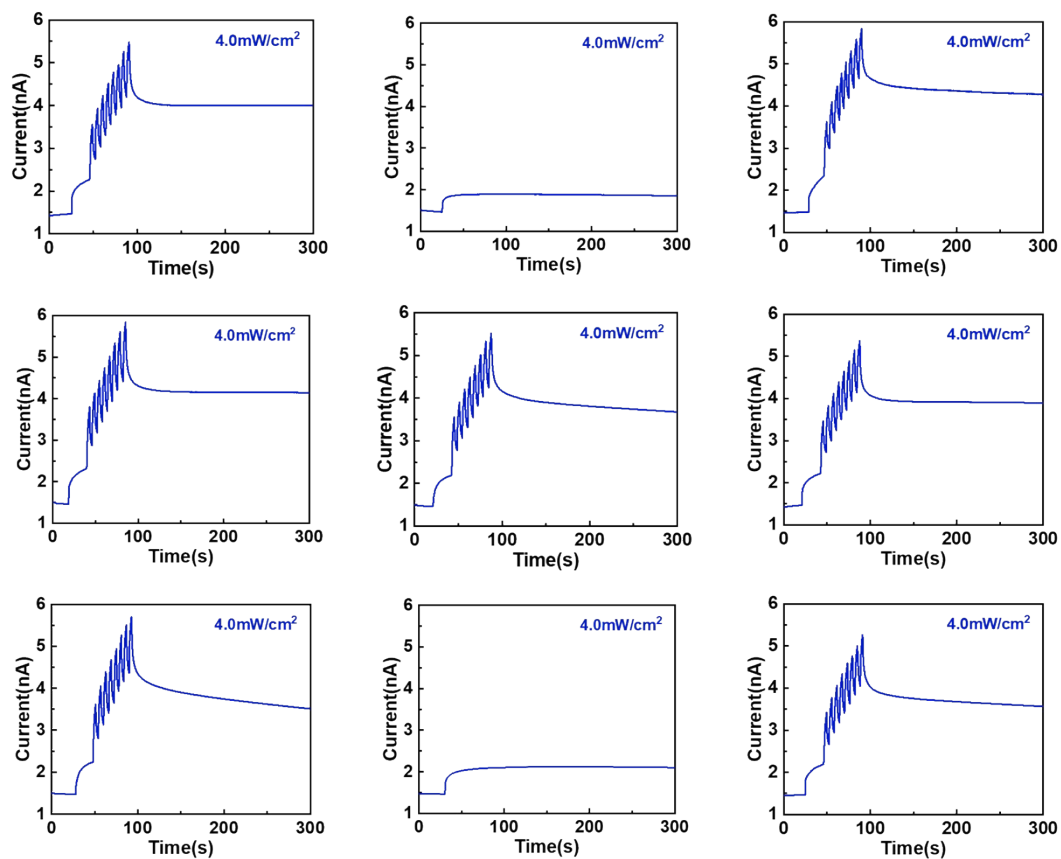

**Fig. S13** The current response triggered by light pulses with ambient brightness of 4.0 mW/cm<sup>2</sup> light intensity.

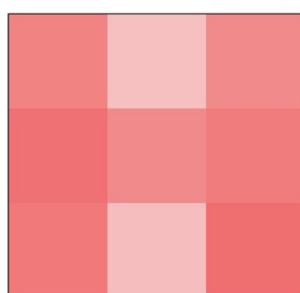

**Fig. S14** The excellent visual memory with decay time at 500 s with 4.0 mW/cm<sup>2</sup> brightness of the ambient illumination.

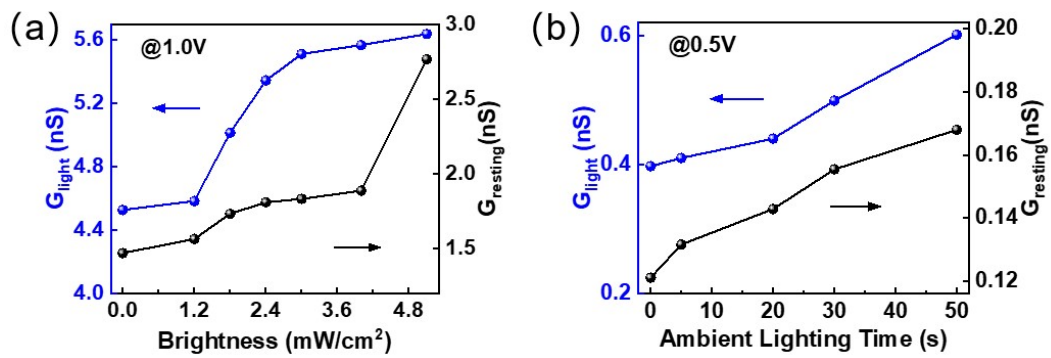

**Fig. S15** (a) The compensatory effect of ambient illumination brightness on emotion and memory. (b) The function between ambient lighting time and emotion and memory.

**Table S1.** Comparison between previous artificial photoelectronic synapse devices and this work.

| Device structure                                                          | Light source | Light intensity (mW/cm <sup>2</sup> ) | Multiple memory | Learning-forgetting - relearning | Optoelectronic synapse array | visual memory influenced by emotion and illumination |
|---------------------------------------------------------------------------|--------------|---------------------------------------|-----------------|----------------------------------|------------------------------|------------------------------------------------------|
| ITO/Nb:SrTiO <sub>3</sub> [10]                                            | visible      | 10-30                                 | ✓               | ✓                                | ✓                            | -                                                    |
| ITO/IGZO/Al <sub>2</sub> O <sub>3</sub> /Al [11]                          | UV           | 0.15                                  | ✓               | -                                | -                            | -                                                    |
| ITO/MO/SiO <sub>x</sub> /IGZO/SiO <sub>x</sub> /SiN <sub>x</sub> /MO [12] | UV           | 500                                   | -               | -                                | -                            | -                                                    |
| ITO/MoS <sub>2</sub> /TiN <sub>x</sub> O <sub>2-x</sub> [13]              | UV           | 0.54-3.56                             | ✓               | ✓                                | ✓                            | -                                                    |
| ITO/SnO <sub>x</sub> /ITO [14]                                            | visible      | 4-16                                  | ✓               | ✓                                | ✓                            | -                                                    |
| ITO/TiO <sub>2</sub> /p-Si (This work)                                    | visible      | 0.5-3.0                               | ✓               | ✓                                | ✓                            | ✓                                                    |

Symbols “✓” and “-” denote demonstrated and non-demonstrated synaptic functions, respectively.

## References

- [1] D. Reyes-Coronado, G. Rodriguez-Gattorno, M. E. Esponosa-Pesqueira, C. Cab, R. Coss and G Oskam, *Nanotechnology*, 2008, **19**, 145605.
- [2] M. D. Shang, and W. Y. Ching, *Phys. Rev. B*, 1995, **51**, 13023.
- [3] J.-G. Li, T. Ishigaki and X. Sun, *J. Phys. Chem. C*, 2007, **111**, 4969.
- [4] M. N. Islam, and J. Podder, *Mat. Sci. in Semicon. Proc.*, 2021, **121**, 105419.
- [5] M. Xiao, K. P. Musselman, W. W. Duley, and Y. N. Zhou, *ACS Appl. Mater. Interfaces*, 2017, **9**, 4808–4817.
- [6] X. Yu, Y. Li, X. Hu, D. Zhang, Y. Tao, Z. Liu, Y. He, M. A. Haque, Z. Liu, T. Wu and Q. J. Wang, *Nat. Commun.*, 2018, **9**, 4299.

- [7] J. Wang, Y. Li, L. Deng, N. Wei, Y. Weng, S. Dong, D. Qi, J. Qiu, X. Chen and T. Wu, *Adv. Mater.*, 2017, **29**, 1603730.
- [8] L. Zhou, J. Y. Mao, Y. Ren, J. Q. Yang, S. R. Zhang, Y. Zhou, Q. Liao, Y. Zeng, H. Shan, Z. Xu, J. Fu, Y. Wang, X. Chen, Z. Lv, S. T. Han and V. A. L. Roy, *Small*, 2018, **14**, 1800288.
- [9] C. J. Wang, Y. H. Liu, L. Q. Zhu, P. Feng, Y. Shi and Q. Wan, *ACS Appl. Mater. Interfaces*, 2016, **8**, 9762.
- [10] S. Gao, G. Liu, H. Yang, C. Hu, Q. Chen, G. Gong, W. Xue, X. Yi, J. Shang and R. W. Li, *ACS Nano*, 2019, **13**, 2634-2642.
- [11] S. Song, M. Kim, G. Yoo, S. M. Kwon, J. S. Heo, S. K. Park and Y. H. Kim, *J. Alloys Compd.*, 2021, **857**, 158027.
- [12] N. Duan, Y. Li, H. C. Chiang, J. Chen, W. Q. Pan, Y. X. Zhou, Y. C. Chien, Y. H. He, K. H. Xue, G. Liu, T. C. Chang and X. S. Miao, *Nanoscale*, 2019, **11**, 17590-17599.
- [13] W. Wang, S. Gao, Y. Li, W. Yue, H. Kan, C. Zhang, Z. Lou, L. Wang and G. Shen, *Adv. Funct. Mater.*, 2021, **31**, 2101201.
- [14] S. E. Ng, J. Yang, R. A. John, and N. Mathews, *Adv. Funct. Mater.*, 2021, **31**, 2100807.
